# Supplementary material for: Heterochely and handedness in the orange mud crab Scylla olivacea: implication for future culture practice optimisation
Source: PeerJ. 2023 Apr 3;11:e15143. doi: 10.7717/peerj.15143 (PMC10078446; doi:10.7717/peerj.15143)
Supplement: Table S1 [file peerj-11-15143-s001.xlsx]

## Sheet: morphometric measurements
																	Handedness based on					NOTE
Sex	BW	CW	ICW	Cl	DL	PL	ML	PD	PW	DL	PL	ML	PD	PW	right tooth	left tooth	tooth	PL	PD	PW
IF	98.2	83.36	79.38	54.27	24.59	54.34	27.59	18.48	12.22	24.68	55.45	28.65	20.03	13.2	3	4.71	L	L	L	L		IF =Immature Female
IF	67.5	74.37	71.29	49.22	21.7	49.29	25.19	18.6	12.45	22.69	47.77	25	16.16	11.28	4.9	2.58	R	R	R	R		IM = Immature Male
IF	104.7	86.19	81.97	58.1	24.27	54.51	28.92	21.49	14.4	23.96	53.38	28.22	19.08	12.96	5.38	3.32	R	R	R	R		MF = Matured Female
IF	59.6	72.18	68.73	47.64	20.39	46	24.19	16.89	11.88	20.43	45.1	24.22	15.75	11.31	3.46	2.28	R	R	R	R		MM = Matured Male
IF	64.7	73.29	69.25	48.82	21.59	45.72	24.93	17.21	11.29	21.82	45.53	24.52	15.58	10.68	3.73	2.77	R	R	R	R
IF	117.1	87.18	89.36	60.55	27.9	57.83	31.57	22.25	19.66	27.89	57.02	30.29	20.91	13.45				R	R	R		BW = Body Weight
IF	107.1	86.47	83.59	59.68	29.68	51.79	32.19	18.99	11.68	29.73	51.44	31.78	17.68	10.78				R	R	R		CW = Carapace Width
IF	96.6	77.98	74.72	54.39	22.93	49.36	30.86	16.78	11.06	22.75	51.56	31.23	19.19	13.25				L	L	L		ICW = Internal Carapace Width
IF	103.6	83.82	80.95	56.47	25.25	54.73	34	21.57	14.26	25	53.06	32.86	18.09	12.56				R	R	R		CL = Carapace Length
IM	72.2	78.08	74.41	50.91	22.43	50.33	26.46	17.47	12	23.47	52.16	27.05	18.92	13.02	2.72	3.44	L	L	L	L
IM	117.2	88	85.18	58.16	27.17	61.35	37.99	25.48	19.02	30.66	60.85	38.32	22.79	14.44				R	R	R		RDL = Right Dactyl Length
IM	102.2	80.4	77.43	52.46	25.1	55.39	33.4	21.34	13.5	26.61	52.16	32.33	19.81	12.38				R	R	R		RPL = Right Propodus Length
IM	89.8	79.18	72.57	51.32	22.36	49.48	30.9	18.57	11.08	23.61	48.47	29.43	10.08	9.77				R	R	R		RML= Right Merus Length
IM	104.6	82.01	78.4	59.48	25.4	52.56	32.81	19.09	13.09	26.31	59.88	32.07	20.02	19.32				L	L	L		RPD = Right Propodus Depth
IM	106.2	80.65	77.89	55.11	25.89	56.75	39.29	20.57	13.44	26.1	52.28	33.38	18.44	12.89				R	R	R		RPW = Right Propodus Width
IM	85.9	75.75	72.82	52.1	23.36	52.22	31.88	18.91	13.37	22.12	51.89	32.78	17.06	12.42				R	R	R
IM	109.8	82.14	78.68	55.09	25.4	54.67	33.81	19.43	12.42	24.41	55.18	34.29	27.33	14.75				L	L	L		LDL = Left Dactyl Length
IM	117.1	85.95	82.32	56.9	25.77	57.23	34.85	20.31	13.35	27.43	57.56	39.8	22.26	13.93				L	L	L		LPL = Left Propodus Length
IM	109.2	78.99	77.23	54.04	25	53.52	34.57	20.39	14.45	25.2	52.27	32.02	18.93	14.22				R	R	R		LML= Left Merus Length
IM	118.3	83.09	79.23	56.55	27.11	58.11	38.1	22.38	13.62	30.49	57.05	35.58	20.07	12.43				R	R	R		LPD = Left Propodus Depth
MF	198.9	102.15	97.78	69.36	32.35	63.56	33.15	21.59	13.54	32.25	64.47	34.56	24.35	16.44				L	L	L		LPW = Left Propodus Width
MF	208.4	103.74	101.88	72.22	32.12	66.67	34.11	25.11	14.78	30.84	63.02	33.14	22.1	14.75				R	R	R
MF	236.2	111.33	107.8	76.6	37.54	73.19	38.04	29.86	16.27	37.63	71.55	38.88	24.43	15.71				R	R	R
MF	274	122.32	117.27	81.86	38.16	73.88	44.5	30.79	19.68	38.51	72.5	41.86	25.92	17.11				R	R	R
MF	199.6	104.46	99.49	71.27	34.29	69.02	33.79	25.95	15.84	34.53	64.47	37.63	21.8	14.58				R	R	R
MF	184.7	102.34	96.67	65.48	32.4	61.68	53.64	24.71	16.19	32.5	60.48	34.55	22.76	14.39				R	R	R
MF	231.3	109.79	104.02	74.36	35.66	67.5	33.57	26.08	15.15	32.54	63.76	34.81	22.94	14.53				R	R	R
MF	213.1	108.25	103.39	71.8	28.76	63.46	35.11	26.5	17.06	30.58	63.37	36.16	22.9	15.04				R	R	R
MF	176.3	99.58	94.58	63.54	27.56	63.6	38.47	25.37	17.96	32.09	62.63	33.57	22.3	14.95				R	R	R
MF	195.2	104.05	97.86	67.35	32.47	64.47	33.59	25.52	18.38	33.44	62.44	33.44	22.29	14.9				R	R	R
MF	201.9	102.6	98.39	69.58	32.66	61	33.74	24.19	14.87	31.9	64	33.45	26.3	15.54				L	L	L
MF	255.1	114.15	110.41	76.39	37.57	71	38.41	27.52	17.45	39.01	67.49	35.44	24.5	16.11				R	R	R
MF	216.3	109.85	104.36	72.68	33.32	65.75	37.82	21.25	13.34	37.22	68.92	38.39	25.36	15.57				L	L	L
MF	161.2	97.97	93.73	67.33	29.84	57	32.4	20.15	11.5	33.02	60.24	33.96	22.7	14.68				L	L	L
MF	197.4	103.8	98.8	70.96	33.56	64.9	34.37	25.24	14.4	33.53	63.86	34.86	22.32	13.8				R	R	R
MF	219.6	106.26	102.47	71.32	33.68	63.97	35.49	26.39	17.45	33.83	62.67	34.26	24.15	16.18				R	R	R
MF	202.3	104.1	99.59	69.17	30.75	60.3	34.24	22.05	15.28	34.31	63.56	35.44	27.35	16.26				L	L	L
MF	209.5	109.23	104.14	72.87	31.39	68.72	35.39	27.76	16.64	32.09	66.02	34.99	23.42	15.62	6.87	3.82	R	R	R	R
MF	205.1	105.11	101.05	71.01	32.08	65.93	34.95	23.53	15.48	32.59	68.33	35.42	26.7	17.35	3.52	5.64	L	L	L	L
MF	267.9	117.17	111.34	77.04	32.16	71.83	37.72	30.84	21.59	33.64	69.72	36.44	25.73	18.17	7.27	3.83	R	R	R	R
MF	184.4	110.22	103.97	71.66	31.4	67.11	34.66	26.91	17.71	31.62	64.94	33.34	22.03	14.91	6.93	3.49	R	R	R	R
MF	183.6	108.3	102.66	72.39	31.58	65.17	33.52	22.55	15.36	33.51	68.12	33.73	26.78	17.32	3.14	5.63	L	L	L	L
MF	161.1	102.56	98.57	68.66	28.96	63.69	33.65	25.16	16.22	30.33	62.28	32.8	21.09	14.01	6.25	2.8	R	R	R	R
MF	203.6	111.24	105.57	73.82	30.39	66.87	35.11	26.92	18.29	30.91	64.36	33.29	22.96	15.37	6.4	2.97	R	R	R	R
MF	147.1	98.96	94.77	66.6	27.67	59.92	31.19	20.59	14.12	27.89	61.53	31.94	23.04	14.46	4	5.94	L	L	L	L
MF	140.9	102.28	96.99	66.79	30.57	63.32	32.65	24.65	16.05	29.19	61.69	31.37	20.74	13.79	6.15	4.2	R	R	R	R
MF	301.5	125.16	119.78	86.61	38.41	80.89	40.62	34.23	31.93	37.6	76.64	38.72	27.25	18.42	7.75	4.27	R	R	R	R
MF	224.9	110.19	106.33	76.29	31.26	63.91	52.1	24.15	15.92	22.9	64.29	39.28	26.74	18.53	4.39	6.22	R	L	L	L
MF	226.5	108.89	105.79	73.18	29.86	66.98	41.04	28.21	18.57	33.5	66.02	37.89	26.24	17.68	6.7	4.74	R	R	R	R
MF	195.6	100.11	96.19	67.45	31.77	62.33	33.96	26.73	15.43	31.06	62.09	34.09	24.16	14.49	5.92	3.32	R	R	R	R
MF	219.3	109.29	105.79	72.54	30.22	68.01	42.21	28.43	15.09	29.39	63.64	63.89	25.9	15				R	R	R
MF	271.6	116.32	113.19	80.65	35.71	75.91	38.22	31.17	19.33	36.3	70.54	41.18	30.44	17.5				R	R	R
MF	266.3	114.1	106.38	73.35	36.74	71.06	37.29	29.56	17.78	33.99	68.84	37.89	26.19	16.19				R	R	R
MF	177.5	99.96	97.8	69.29	30.41	52.39	35.47	21.62	13.85	31.08	64	37.41	25.15	15.08				L	L	L
MF	153.6	95.43	93.14	65.34	28.06	58.06	35.54	20.03	12.26	30.25	60.12	36.22	21.27	13.59				L	L	L
MF	102	83.32	78.08	54.29	25.31	51.89	30.28	19.4	13.18	26.94	51.73	30.88	19.14	11.14				R	R	R
MF	272.4	115.3	112.8	79.44	34.39	74.21	37.88	30.48	19.21	35.89	69.33	40.32	30.21	17.2				R	R	R
MF	260.3	113.8	105.43	73.22	36.55	70.85	37.21	29.44	17.65	32.85	68.45	37.27	26.05	16.32				R	R	R
MF	167.1	98.32	96.53	68.77	29.88	51.27	35.32	21.55	13.76	30.9	63.57	37.22	25.09	14.78	4.32	6.68	L	L	L	L
MF	152.8	94.77	92.83	65.21	28.12	57.9	35.17	19.3	12.43	30.3	60.02	35.98	21.08	13.33	4.02	5.89	L	L	L	L
MM	217.4	95.53	94.07	65.48	36.72	81.92	41.66	35.41	21.15	35.46	76.64	39.5	31	20				R	R	R
MM	249.1	98.92	95.49	67.11	35.01	77.67	43.39	34.84	22.37	34.74	76.34	41.51	31.71	20.8				R	R	R
MM	273.6	100.84	98.1	68.81	35	81.33	45.95	39.02	24.74	37.19	78.66	45.66	34.55	21.61				R	R	R
MM	389.5	123.06	119.72	85	43.43	78.73	46.14	34.15	22.31	30.54	77.12	43.39	31.59	21.18				R	R	R
MM	247.2	111.28	99.02	68.84	38.57	80.37	43.73	39.52	23.14	38.87	77.44	42.78	35.04	21.53				R	R	R
MM	318.7	113.05	108.38	74.62	41.55	89.84	46.57	43.48	27.48	40.22	86.66	48.8	36.78	24.52				R	R	R
MM	313.4	114.57	111.68	78.42	42.02	81.81	41.38	32.4	21.11	43.33	84.62	44.06	38.24	23.22				L	L	L
MM	320	110.95	107.65	75.29	47.25	92.22	48.03	43.02	24.66	41.01	87.36	45.38	37.43	22.62				R	R	R
MM	251.3	104.7	101.39	68.48	39.05	81.34	45.73	36.56	23.53	37.77	80.26	45.03	34.11	20.53				R	R	R
MM	278.7	106.81	104.4	70.3	40.75	86.52	43.18	35.49	23.06	49.12	81.51	44.36	33.96	19.27				R	R	R
MM	204.6	98.74	96.19	68.54	36.99	71.28	40.28	28.19	20.41	35.37	69.63	38.4	26.8	19.07				R	R	R
MM	293.7	105.63	102.87	74.16	40.46	85.32	44.43	36.81	22.02	37.51	79.51	47.32	33.02	20.54				R	R	R
MM	237.2	99.68	95.93	69.38	37.75	77.6	41.82	34.17	20.26	36	75.7	41.08	30.51	19.6				R	R	R
MM	241.5	108.45	102.94	71.16	36.27	72.97	42.18	27.94	17.44	36.6	74.36	40	31.87	20.47				L	L	L
MM	255.2	104.12	101.12	69.35	38.04	79.93	42.22	37.45	23.01	NULL	77.43	40.87	33.71	21.02				R	R	R
MM	266	103.61	99.88	69.29	37.25	79.28	42.46	34.95	20.47	37.78	70.25	45.65	31.91	19.14				R	R	R
MM	376	116.24	114.31	80.43	49.3	94.17	50.22	41.78	26.59	44.29	83.84	48.88	38.94	22.89				R	R	R
MM	314.9	111.78	106.83	72.69	42.1	88.66	51.62	42.87	26.32	42.45	84.28	48.47	37.8	23.85				R	R	R
MM	245.8	99.99	96.77	68.53	37.65	79.43	41.56	37.64	22.96	37.97	70.24	41.38	35.53	19.96				R	R	R
MM	271.2	101.17	97.78	67.24	39.1	78.13	42.61	32.07	25.11	40.4	80.78	40.45	37.55	32.02				L	L	L
MM	224.4	97.32	93.16	64.21	36.93	77.33	41.06	35.7	23.92	34.22	66.4	34.08	26.04	17.81				R	R	R
MM	282.7	107.41	104.9	73.51	40.25	84.02	46.98	37.49	24.29	44.5	81.71	47.48	33.57	21.9				R	R	R
MM	298.6	103.71	100.25	70.49	40.82	81.18	44.71	34.46	21.75	43.38	89.85	44.15	38.66	24.3				L	L	L
MM	224	103.27	99.23	69.28	35.52	70.16	37.42	29.35	19.79	33.88	68.55	36.04	27.76	18.74				R	R	R
MM	231.3	104.8	100.35	66.17	34.56	78.54	42.1	36.6	22.49	35.89	73.3	42.07	32.95	22.44				R	R	R
MM	240.2	100.19	95.74	65.53	38.41	74.65	41.04	31.23	20.12	36.12	79.32	41.02	35.67	21.83				L	L	L
MM	231.4	97.18	93.99	64.68	34.81	76.33	40.16	33.96	22.12	NULL	72.37	39.86	29.78	20.26				R	R	R
MM	310.7	110.62	105.22	71.6	38.75	79.29	44.1	35.74	22.94	37.88	82.38	44.98	39.09	24.37				L	L	L
MM	236.4	101.58	98.08	66.36	56.58	73.94	38.54	34.17	21.7	36.57	71.41	39.08	31.63	19.21				R	R	R
MM	247.8	101.78	96.78	67.38	40.42	83.31	42.06	45.01	22.63	40.93	78.18	41.92	31.26	20.14				R	R	R
MM	142.1	88.17	85.82	60.42	25.77	57.05	32.01	20.68	14.61	28.75	62.45	32	24.5	16.72	2.85	5.84	L	L	L	L
MM	148.7	92.6	87.6	60.89	28.24	64.66	33.36	26.85	17.45	27.44	61.96	32.18	22.5	15.08	6.48	4.18	R	R	R	R
MM	133.5	92.64	89.41	60.8	28.64	63.31	33.25	21.09	14.81	28.25	64.41	33.39	24.19	16.56	3.06	5.98	L	L	L	L
MM	213.8	106.34	102.24	69.7	32.94	69.61	36.95	28.35	19.61	35.12	81.19	42.04	37.07	23.6	4.61	8.13	L	L	L	L
MM	220.5	104.72	100.85	71.37	33.11	71.13	37.8	27.65	17.81	34.94	74.99	39.51	31.7	21.18	4.11	6.71	L	L	L	L
MM	173.4	90.88	88.77	61.25	27.63	64.84	44.5	30.06	19.62	28	61.9	43.33	27.02	17.49	6.22	4.92	R	R	R	R
MM	391.3	109.48	106.06	78.54	42.85	97.62	67.94	46.03	19.15	40.26	76.4	55.3	34.96	23.63	8.39	5.03	R	R	R	L
MM	236.8	103.65	102.29	73.07	38.15	76.67	49.69	33.2	20.1	31.78	70.69	50.06	29.69	19.49				R	R	R
MM	262	101.22	95.58	68.2	38.8	76.08	46.79	32.32	19.09	35.55	79.16	43.07	35.77	22.32				L	L	L
MM	317.2	102.91	101.7	70.69	39.76	86.69	49.88	42.39	26.86	37.64	82.49	46.31	36.32	20.29	8.43	6.56	R	R	R	R
MM	350.1	110.51	107.64	96.8	37.33	89.14	51.05	44.04	30.99	37.14	84.96	50.29	38.32	23.98	8.29	6.47	R	R	R	R
MM	378.7	114.09	109.72	72.52	44.07	94.86	50.82	46.17	27.32	38.84	82.26	43.33	34.17	22.82				R	R	R
MM	247.4	97.42	95.45	66.46	35.48	79.9	42.21	36.14	24.1	34.26	74.37	41	32.39	21.16				R	R	R
MM	235.8	104.55	101.62	72.59	35.38	71.4	42.54	27	20.09	29.73	76.37	41.55	31.49	26.44				L	L	L
MM	200.6	98.81	95.74	67.87	28.77	69.99	38.35	29.29	19.54	32.33	65.7	39.56	27.58	17.77	7.01	4.45	R	R	R	R
MM	162.4	92.93	89.91	63.19	30.39	65.94	36.68	28.2	16.76	30.27	63.56	34.87	24.4	15.77	6.63	4.21	R	R	R	R
MM	182.1	91.96	90.08	63.58	29.71	69.05	33.88	28.8	20.08	29.37	64.96	33.41	26.78	17.14				R	R	R
MM	150.7	87.81	86.98	62.03	27.96	62.32	35.46	25.26	15.78	30.55	63.65	34.34	29.48	15.81	4.05	6.25	L	L	L	L
MM	141.6	86.98	84.68	59	28.95	60.13	32.3	21.49	14.66	29.9	61.99	32.14	26.99	14.78	3.44	6.18	L	L	L	L
MM	148.3	92.05	80.19	61.18	30.12	65.9	30.32	26.5	14.61	30.99	63.52	39.35	23.26	15.37				R	R	L
MM	183	94.33	91.3	63.09	32.4	68.31	41.62	26.41	14.95	33.16	71.38	40.81	28.81	18.21				L	L	L
MM	168	92.68	88.4	61.49	30.09	65.78	30.69	26.12	16.52	29.66	63.23	38.42	21.93	14.55				R	R	R
MM	222.8	109.64	106.27	74.13	38.68	90.77	52.92	40.58	26.43	43	82.79	50.1	37.42	24				R	R	R
MM	130.1	90.25	84.3	59.49	20.63	61.96	36.86	27.5	16.69	29.41	60.98	37.11	22.6	19.9	6.4	4.29	R	R	R	L
MM	117.4	84.96	80.82	56.96	25.48	67.07	35	25.4	14.7	25.75	56.52	33.29	19.75	13.18	5.77	3.89	R	R	R	R
MM	116.1	83.85	81.23	55.69	27.11	57.47	39.66	21.44	19.5	25.14	54.3	39.32	19.4	12.94				R	R	R
MM	130.1	89.3	82.2	56.87	26.63	58.08	36.67	22.28	14.92	26.99	58.63	38.06	29.99	15.87				L	L	L
MM	172.5	93.93	90.48	63.02	24.33	60.48	37.56	22.21	17.11	30.98	61.06	37.99	23.35	16.57				L	L	R
MM	134.9	86.77	83.38	59.03	29.79	60.92	36.48	25.07	17.81	27.96	58.81	35.81	21.94	15.11				R	R	R
MM	137.9	91.2	86.44	59.59	30.47	63.13	38.45	24.64	15.53	29.69	61.05	37.97	22	15.27				R	R	R
MM	127.7	85.3	82.86	57.15	26.73	55.95	36.18	19.69	11.37	27.82	60.79	38.85	22.73	13.82				L	L	L
MM	123.4	86.17	82.67	58.66	27.33	60.31	36.36	21.86	15.85	29.4	59.26	36.03	21.1	14.21				R	R	R
MM	126.4	87.39	84.73	58.95	28.75	61.45	36.11	22.74	15.99	27.55	59.94	36.15	20.26	13.48				R	R	R
MM	139.2	85.7	83.99	60.15	29	61.1	40.26	23.96	14.12	29.09	60.21	37.65	22.53	15.52				R	R	L
MM	119.1	84.97	82.99	57.47	27.38	61.39	36.47	22.68	14.73	27.56	58.1	36.12	20.15	13.18				R	R	R
MM	177	93.29	90.74	61.44	32.17	66.92	40.32	26.26	15.09	31.16	69.32	40.97	29.31	16.58				L	L	L
MM	192	97.16	94.24	65.41	32.58	70.08	42.06	26.96	18.01	34.63	68.7	41.7	24.77	16.59				R	R	R
MM	161.8	91.74	89.34	61.96	30.34	65.36	41.33	23.6	16	30.35	65.07	40.95	23.16	15.8				R	R	R
MM	161.6	92.33	89.82	63.46	31.73	67.13	40.72	26.23	17.97	26.42	58.09	39.3	22.3	15.23				R	R	R
MM	205.4	98.52	94.58	64.81	33.64	67.22	40.28	30.14	19.83	33.73	66.22	42.35	26.66	17.05				R	R	R
MM	436.6	119.61	114.84	80.5	43.68	98.5	55.5	47.43	30.9	45.57	96.54	55.06	42.54	28.18				R	R	R
MM	121	85.94	81.48	56.41	26.66	56.82	34.66	23.26	16.15	25.27	51.5	31.81	17.38	11.88				R	R	R
MM	228.2	93.35	91.3	63.54	34.37	73.53	43.78	27.16	19.16	35.96	75.38	42.91	32.54	20.31				L	L	L
MM	184.5	93.63	92.5	64.46	32.73	67.96	41.58	26.87	17.6	27.35	60.36	38.75	22.43	15.42				R	R	R
MM	161.1	88.02	85.06	60.61	30.93	49.36	30.86	16.78	11.06	22.75	51.56	31.25	19.19	13.25				L	L	L
MM	175.5	90.03	88.76	61.16	25.93	67.79	40.49	29.96	19.29	27.48	63.56	41.04	27.2	17.47				R	R	R
MM	172	89.02	87.61	62.15	29.11	65.31	39.5	26.49	17.85	30.91	60.88	37.93	23.84	16.39				R	R	R
MM	157.2	91.29	88.4	61.27	28.49	64.39	37.71	26.18	16.7	28.37	62.98	38.78	24.03	16.08				R	R	R
MM	144.2	89.77	86.2	60.86	29.04	59.73	37.93	29.22	16.09	28.2	60.23	38.65	29.33	16.69				L	L	L
MM	184.1	96.26	89.81	63.12	28.06	66.87	39.71	29.33	18.87	27.4	65.19	38.65	28.01	16.09				R	R	R
MM	153	92.14	88.46	61.38	28.01	64.76	38.85	25.29	17.33	27.62	62.9	37.12	22.92	15.29				R	R	R
MM	170.8	92.01	87.86	62.28	31.29	66.33	40.98	27.43	17.95	31.09	64.47	42.75	23.62	16.47				R	R	R
MM	205.4	100.73	96.96	67.9	33.51	73.03	42.73	30.61	20.78	34.08	70.02	42.58	26.74	18.19				R	R	R
MM	238.7	105.26	102.54	71.19	34.64	74.28	46.76	30.49	20.81	35.89	73.55	43.77	26.43	17.72				R	R	R
MM	179.4	93.92	91.77	63.34	31.92	65.1	39.9	25.79	15.77	31.24	67.49	40.08	29.03	16.99				L	L	L
MM	194.2	100.98	98.79	69.13	29.73	59.37	37.89	22.75	12.66	29.45	62.33	37.49	23.58	15.19				L	L	L
MM	145.1	89.37	87.28	60.78	28.63	60.85	35.82	25.07	16.87	28.61	60.71	39.37	21.66	15.5				R	R	R
MM	151.2	92.07	88.68	61.29	28.19	69.05	38.41	24.68	16.91	29.05	62.24	37.28	22.98	15.56				R	R	R
MM	158.8	92.07	88.68	62.3	28.02	64.38	38.99	26.2	17.52	27	63.03	38.14	24.58	16.01				R	R	R
MM	174.6	94.42	63.17	69.31	27.23	63.12	38.69	23.49	16.69	31.91	66.65	40.05	26.59	18.32				L	L	L
MM	239.4	105.27	101.08	70.25	33.22	72.96	45	28.34	19.33	33.12	76.32	45.33	32.08	20.21				L	L	L
